# Supplementary material
Source: publisher figshare collection journal article supplement (https://sage.figshare.com/ndownloader/files/13175153)

Figure A1 Time devoted to policy work (N=849,  $\alpha=0.61$ )

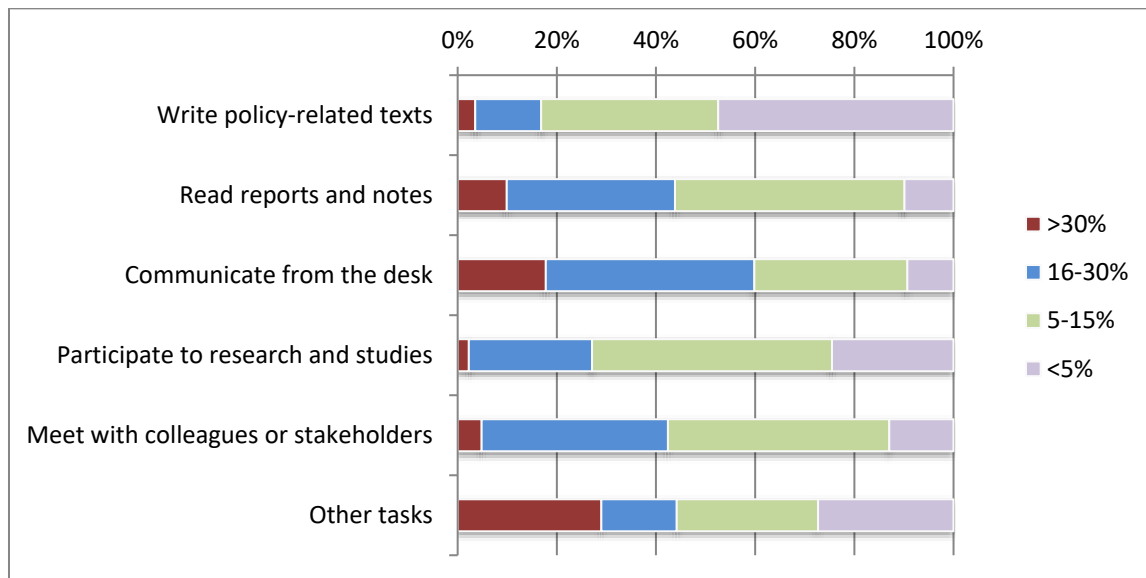

Figure A2 Information sources used in policy work (N=759,  $\alpha=0.88$ )

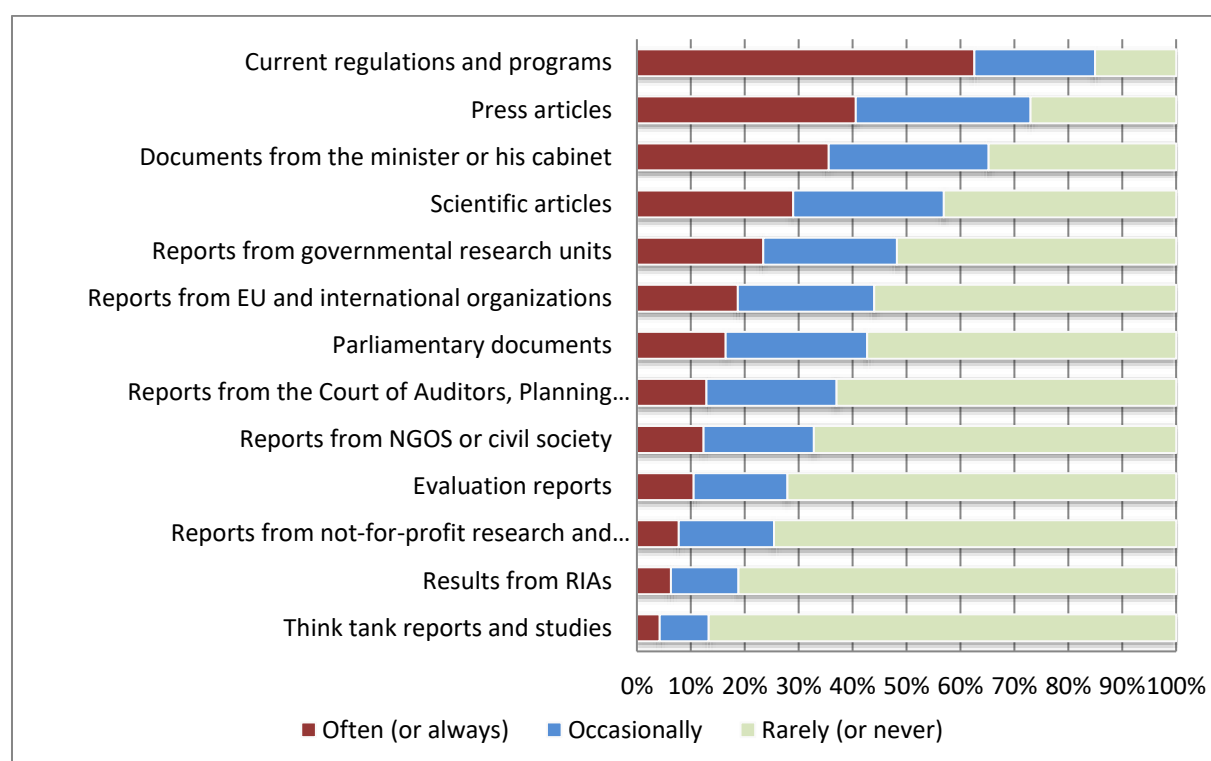

Figure A3 Advice requested or received

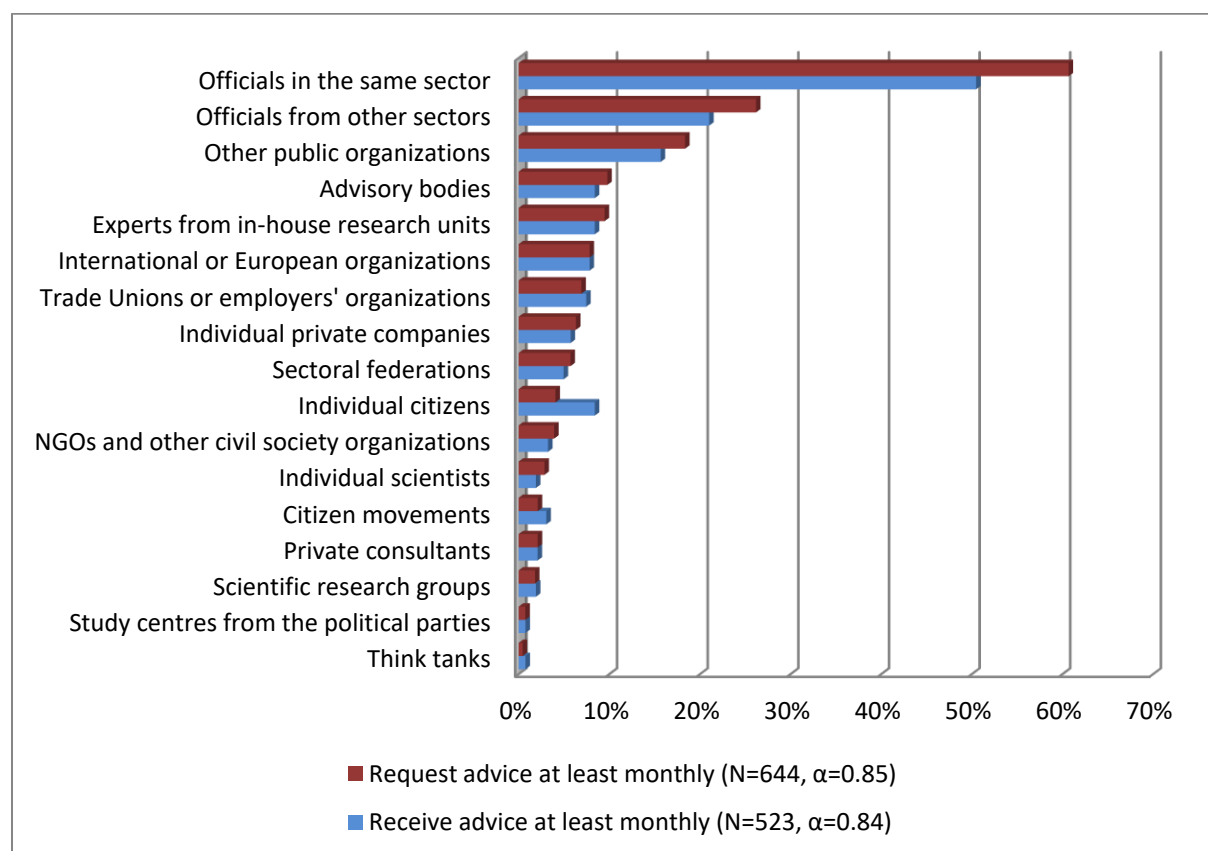

Supplement: Supplementary file 1 [file 13175153]
